# Supplementary material
Source: PubMed Central journal article supplement (PMC3889766)

**SUPPLEMENTARY FIGURE 1: Detection of positive selection within lineage I.**

Recombination rate  $\rho$  (A), selection parameter  $\omega$  (B) and posterior probability of  $\omega \geq 1$  (C) at genes *actA*, *dapE*, *ldh* and *inlC*, as inferred using software OMEGAMAP. The dotted line marks  $\omega = 1$  in panel B and  $P = 0.95$  in panel C. The stars indicate sites with posterior probability of positive selection  $> 0.95$ .

*ActA* Lineage I

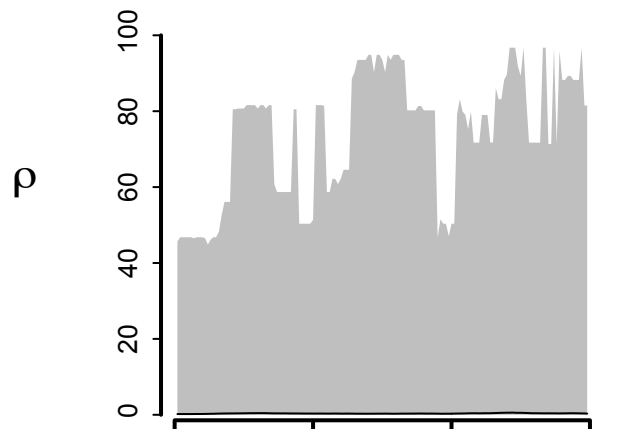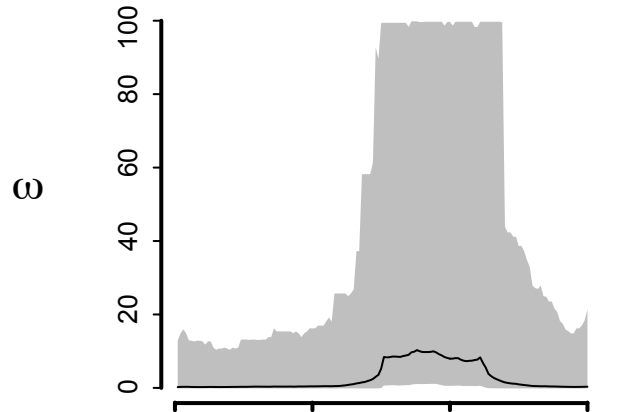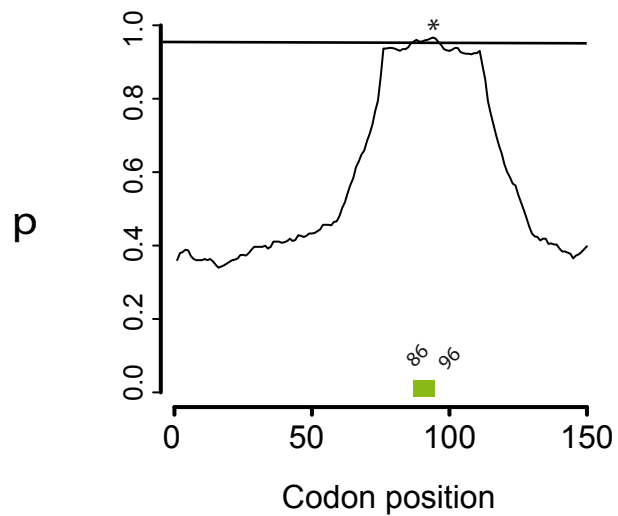

*DapE* Lineage I

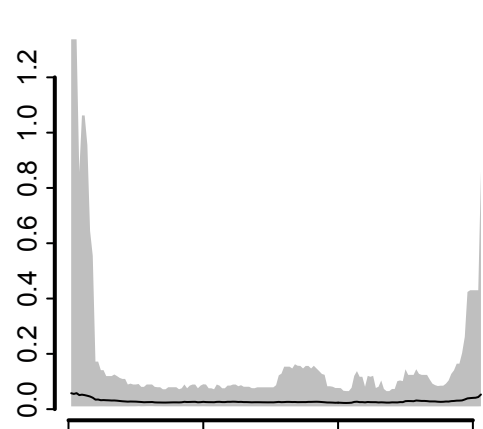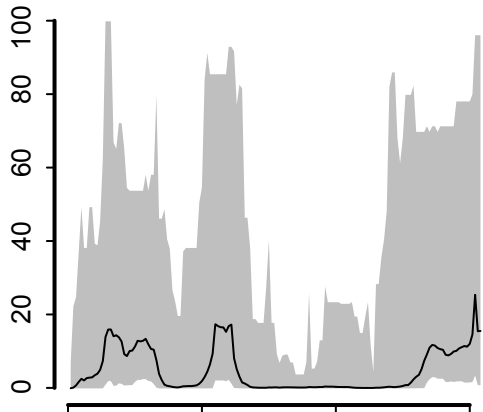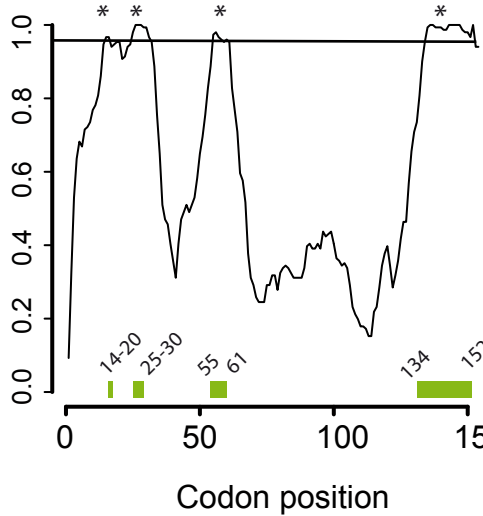

*Ldh* Lineage I

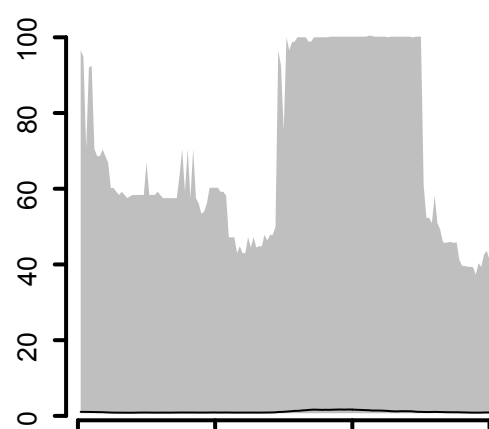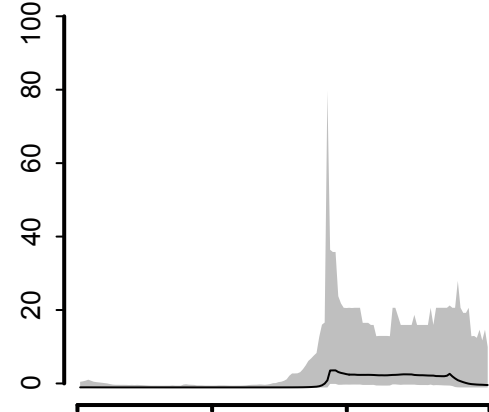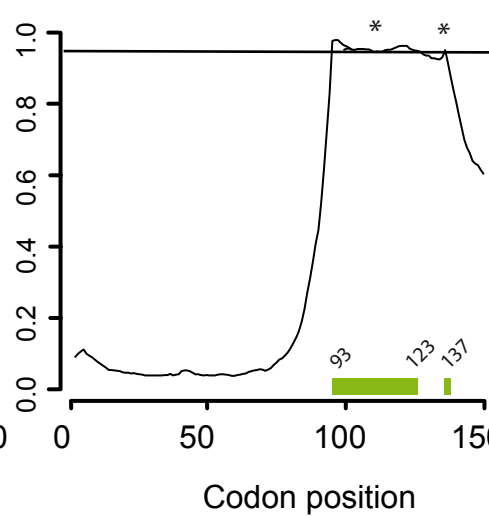

*InlC* lineage I

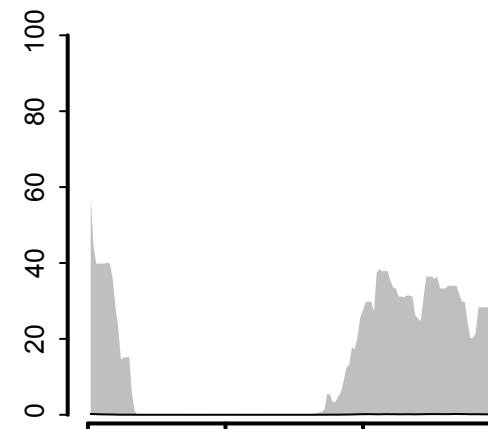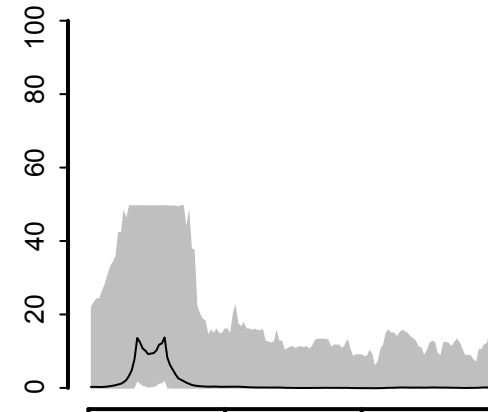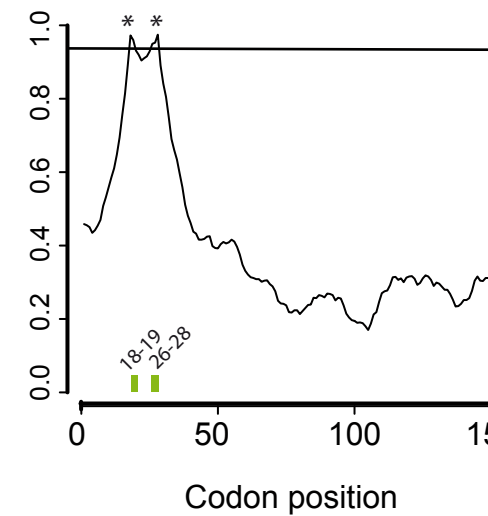

Supplement: JCM.01874-13_zjm999092927so1.pdf [file JCM.01874-13_zjm999092927so1.pdf]
