# Supplementary material
Source: PubMed Central journal article supplement (PMC3889766)

**SUPPLEMENTARY FIGURE 2: PFGE diversity of 110 *Listeria monocytogenes* isolates and correspondence with MLST and MvLST data.**

The UPGMA tree was constructed based on the number of different bands observed on *ApaI* and *AscI* patterns using the ‘average of experiments function’ in BioNumerics v6.6. Lin., lineage; CC: clonal complex; ST: sequence type. The figure is spread on two pages, with two strains being repeated in order to mark continuity.

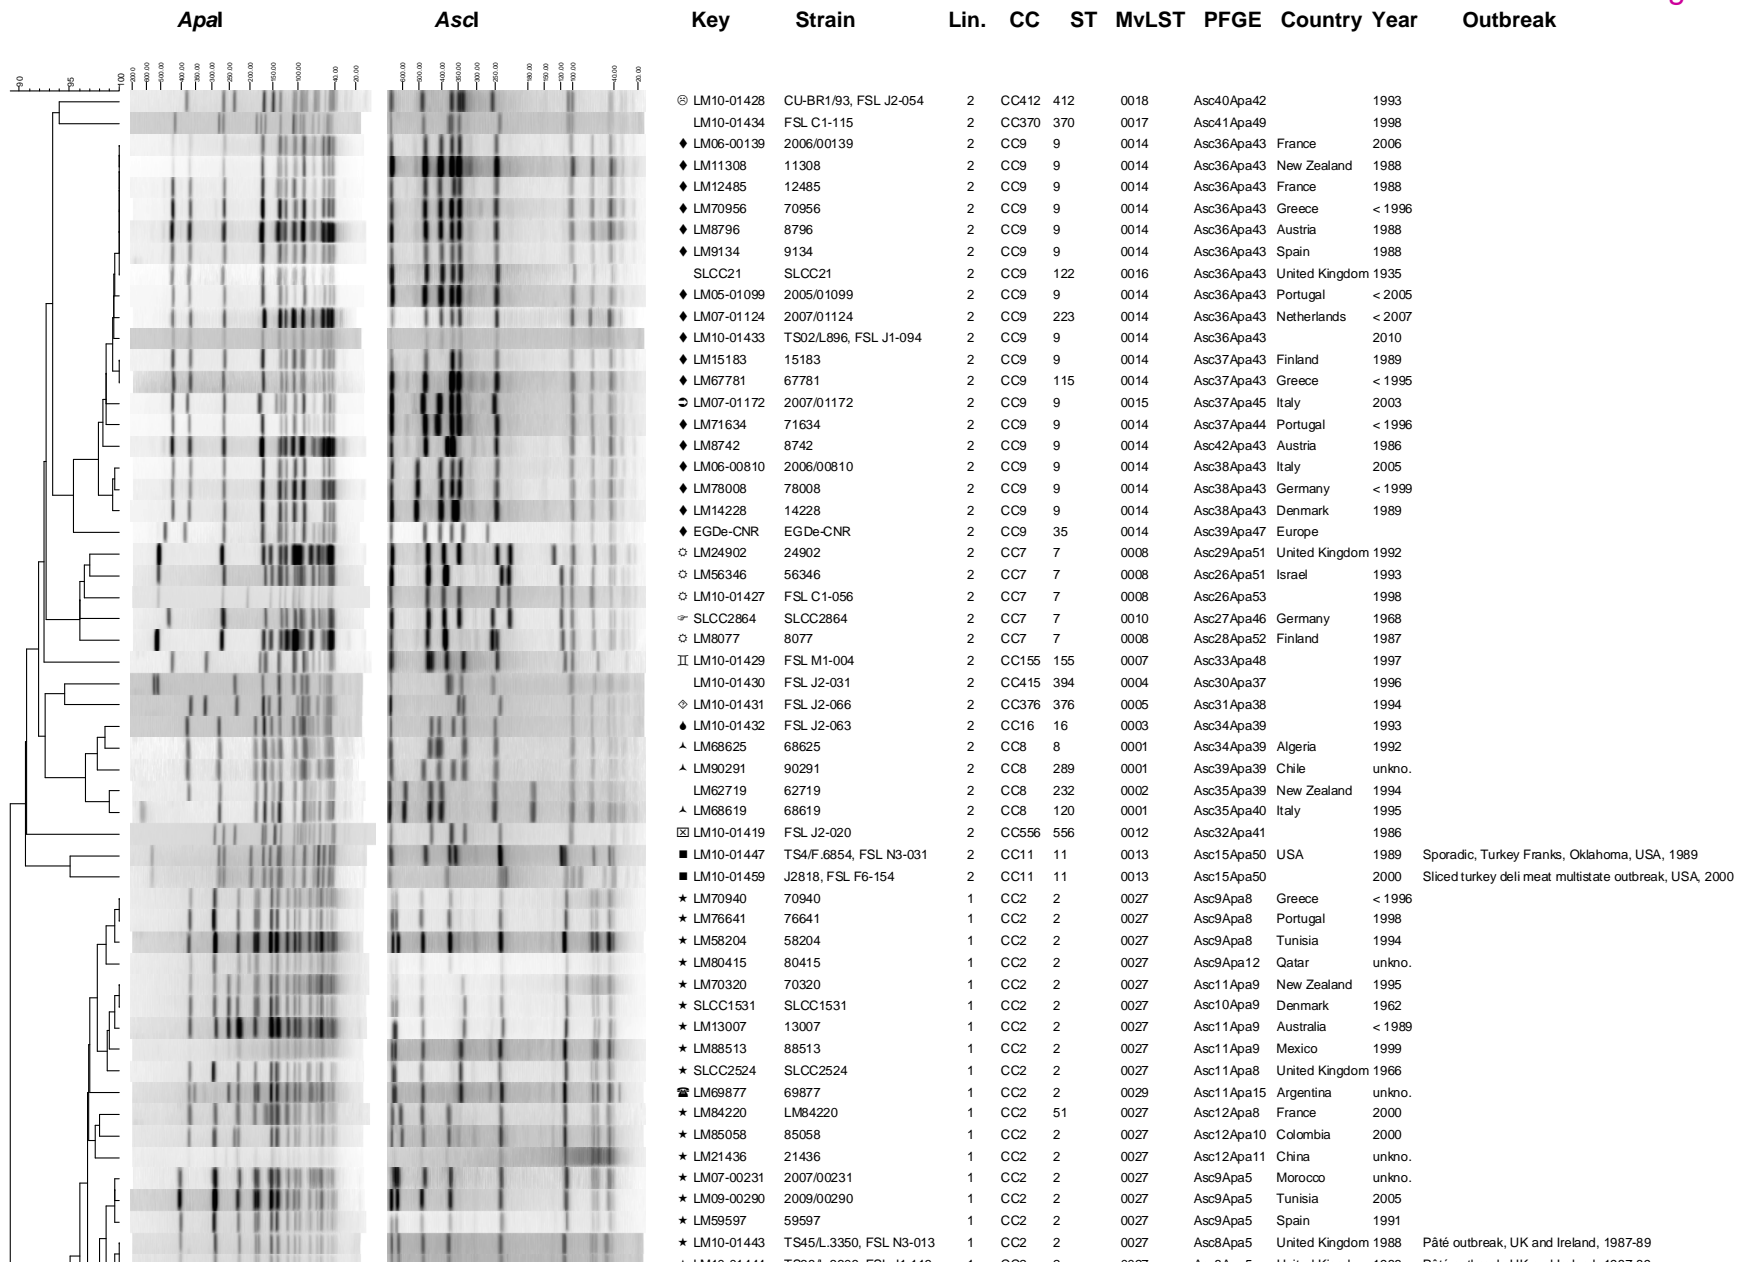

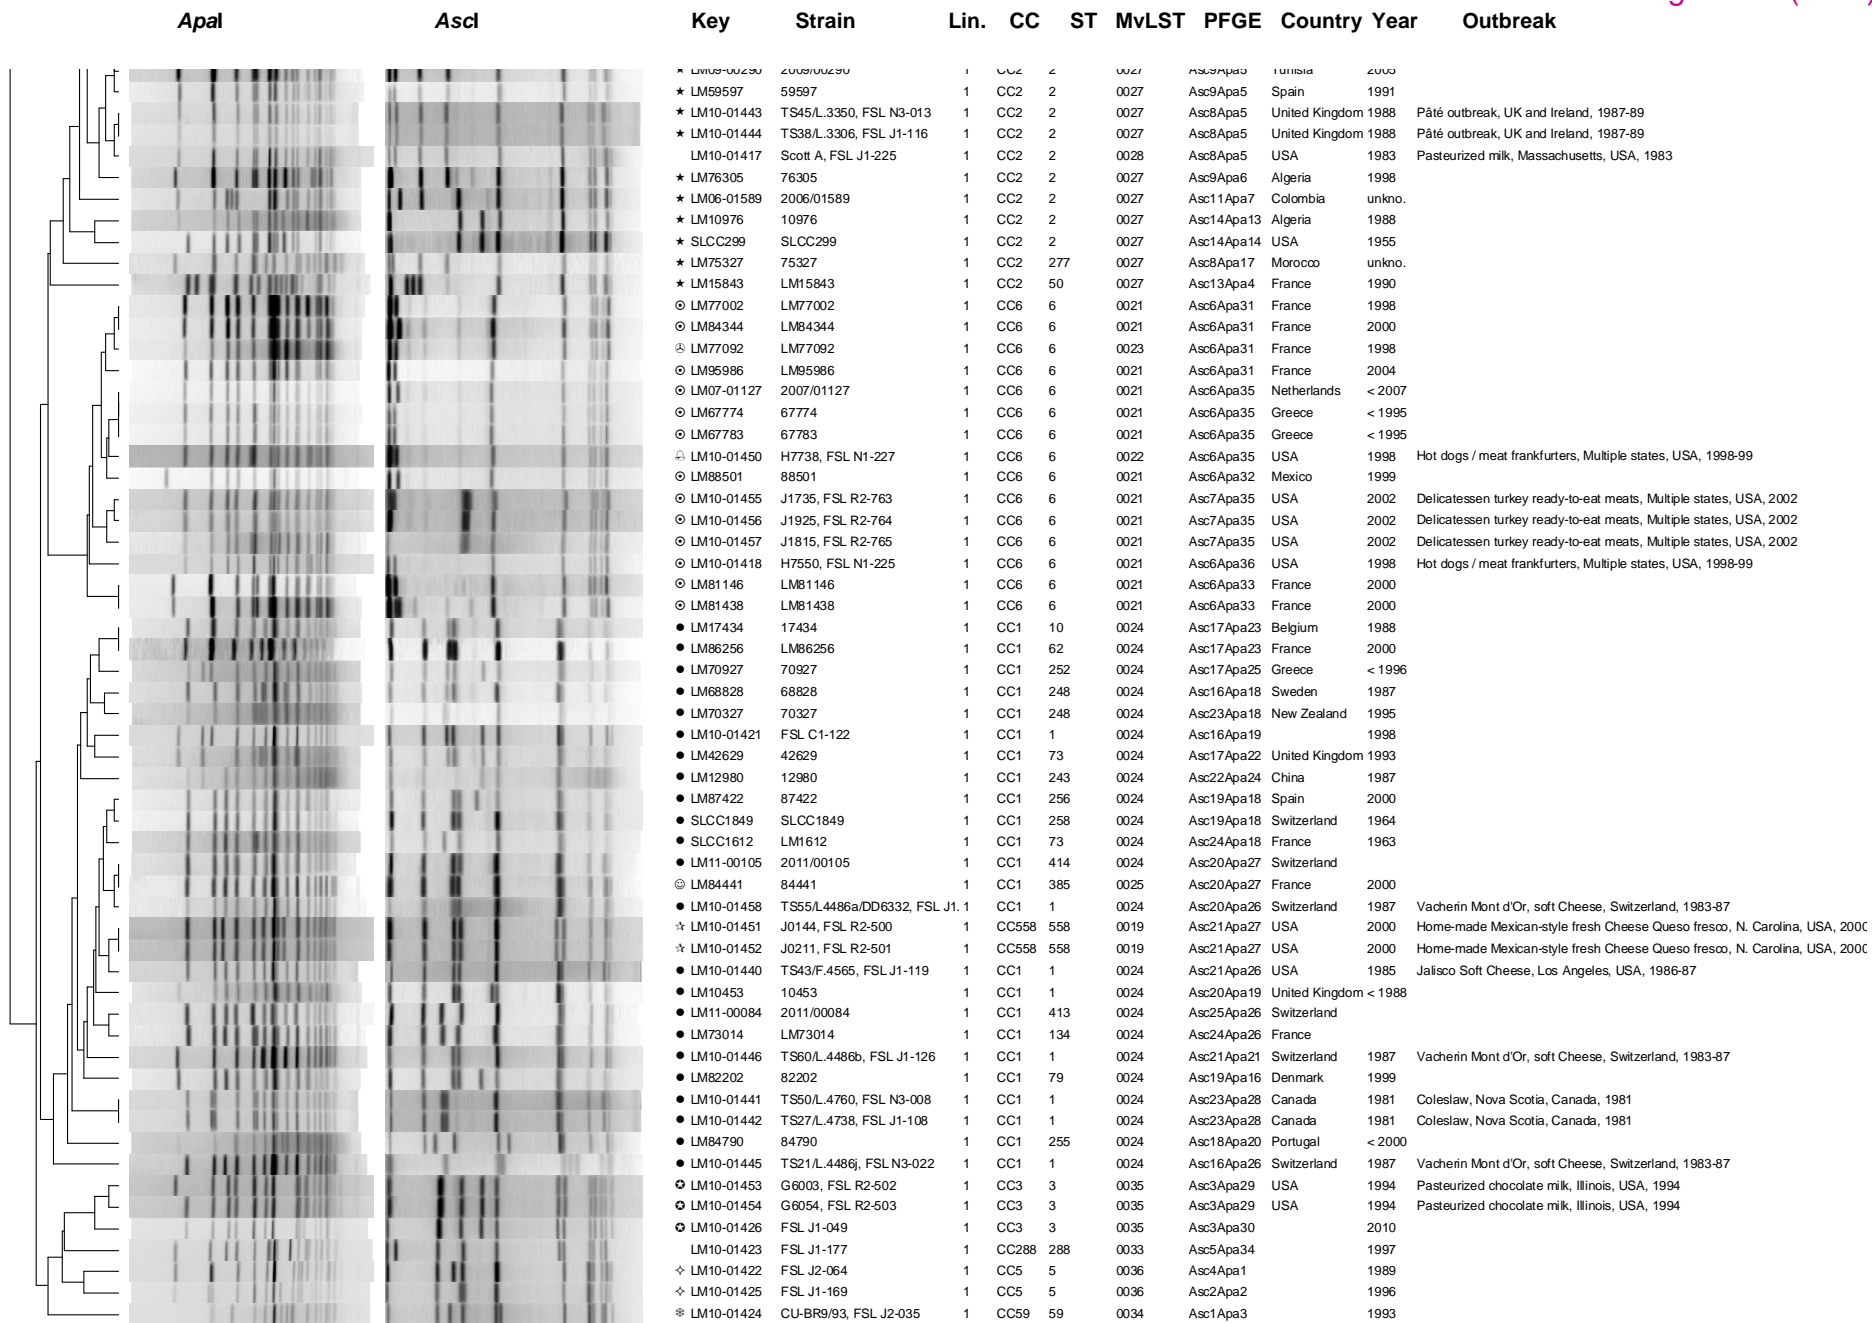

Supplement: JCM.01874-13_zjm999092927so2.pdf [file JCM.01874-13_zjm999092927so2.pdf]
