# Supplementary material
Source: PubMed Central journal article supplement (PMC3889766)
Supplement: JCM.01874-13_zjm999092927so3.pdf [file JCM.01874-13_zjm999092927so3.pdf]

Table S1. Strains included in the study.

| Key        | Strain name                     | Origin      | Country         | Year    | Source or collection | Inclusion subset       | Outbreak                                                            | Lineage | PCR serogroup | Clonal complex | ST  | Ldh change | MvLST type | PFGE pattern |
|------------|---------------------------------|-------------|-----------------|---------|----------------------|------------------------|---------------------------------------------------------------------|---------|---------------|----------------|-----|------------|------------|--------------|
| F2365      | F2365                           | Food        | California, USA | 1985    | GenBank              | Outbreak set           | Jalisco soft cheese, California, 1986-1987                          | 1       | IVb           | CC1            | 1   |            | 0024       | n.d.         |
| LM10-01421 | FSL C1-122                      | Human       |                 | 1998    | ILSI                 | Diversity Set          |                                                                     | 1       | IVb           | CC1            | 1   |            | 0024       | Asc16Apa19   |
| LM10-01440 | TS43/F.4565, FSL J1-119         | Human       | USA             | 1985    | ILSI                 | Outbreak set           | Jalisco Soft Cheese, Los Angeles, USA, 1986-87                      | 1       | IVb           | CC1            | 1   |            | 0024       | Asc21Apa26   |
| LM10-01441 | TS50/L.4760, FSL N3-008         | Food        | Canada          | 1981    | ILSI                 | Outbreak set           | Coleslaw, Nova Scotia, Canada, 1981                                 | 1       | IVb           | CC1            | 1   |            | 0024       | Asc23Apa28   |
| LM10-01442 | TS27/L.4738, FSL J1-108         | Human       | Canada          | 1981    | ILSI                 | Outbreak set           | Coleslaw, Nova Scotia, Canada, 1981                                 | 1       | IVb           | CC1            | 1   |            | 0024       | Asc23Apa28   |
| LM10-01445 | TS21/L.4486j, FSL N3-022        | Food        | Switzerland     | 1987    | ILSI                 | Outbreak set           | Vacherin Mont d'Or, soft Cheese, Switzerland, 1983-87               | 1       | IVb           | CC1            | 1   |            | 0024       | Asc16Apa26   |
| LM10-01446 | TS60/L.4486b, FSL J1-126        | Human       | Switzerland     | 1987    | ILSI                 | Outbreak set           | Vacherin Mont d'Or, soft Cheese, Switzerland, 1983-87               | 1       | IVb           | CC1            | 1   |            | 0024       | Asc21Apa21   |
| LM10-01458 | TS55/L.4486a/DD6332, FSL J1-123 | Human       | Switzerland     | 1987    | ILSI                 | Outbreak set           | Vacherin Mont d'Or, soft Cheese, Switzerland, 1983-87               | 1       | IVb           | CC1            | 1   |            | 0024       | Asc20Apa26   |
| LM10453    | 10453                           | Food        | United Kingdom  | < 1988  | CLIP                 | Selected based on MLST |                                                                     | 1       | IVb           | CC1            | 1   |            | 0024       | Asc20Apa19   |
| LM17434    | 17434                           | Food        | Belgium         | 1988    | CLIP                 | Selected based on MLST |                                                                     | 1       | IVb           | CC1            | 10  |            | 0024       | Asc17Apa23   |
| LM86256    | LM86256                         | Human       | France          | 2000    | CLIP                 | Selected based on MLST |                                                                     | 1       | IVb           | CC1            | 62  |            | 0024       | Asc17Apa23   |
| LM42629    | 42629                           | Unknown     | United Kingdom  | 1993    | CLIP                 | Selected based on MLST |                                                                     | 1       | IVb           | CC1            | 73  | T123J      | 0024       | Asc17Apa22   |
| SLCC1612   | LM1612                          | Human       | France          | 1963    | SLCC                 | Selected based on MLST |                                                                     | 1       | IVb           | CC1            | 73  | T123J      | 0024       | Asc24Apa18   |
| LM82202    | 82202                           | Human       | Denmark         | 1999    | CLIP                 | Selected based on MLST |                                                                     | 1       | IVb           | CC1            | 79  | E137K      | 0024       | Asc19Apa16   |
| SLCC83     | LM83                            | Food        | USA             | 1937    | SLCC                 | Selected based on MLST |                                                                     | 1       | IVb           | CC1            | 119 | Y95N       | 0026       | n.d.         |
| LM73014    | LM73014                         | Unknown     | France          |         | CLIP                 | Selected based on MLST |                                                                     | 1       | IVb           | CC1            | 134 | T123J      | 0024       | Asc24Apa26   |
| LM12980    | 12980                           | Unknown     | China           | 1987    | CLIP                 | Selected based on MLST |                                                                     | 1       | IVb           | CC1            | 243 |            | 0024       | Asc22Apa24   |
| LM68828    | 68828                           | Human       | Sweden          | 1987    | CLIP                 | Selected based on MLST |                                                                     | 1       | IVb           | CC1            | 248 | S120R      | 0024       | Asc16Apa18   |
| LM70327    | 70327                           | Human       | New Zealand     | 1995    | CLIP                 | Selected based on MLST |                                                                     | 1       | IVb           | CC1            | 248 | S120R      | 0024       | Asc23Apa18   |
| LM70927    | 70927                           | Animal      | Greece          | < 1996  | CLIP                 | Selected based on MLST |                                                                     | 1       | IVb           | CC1            | 252 | Y95C       | 0024       | Asc17Apa25   |
| LM84790    | 84790                           | Environment | Portugal        | < 2000  | CLIP                 | Selected based on MLST |                                                                     | 1       | IVb           | CC1            | 255 | A93D       | 0024       | Asc18Apa20   |
| LM87422    | 87422                           | Human       | Spain           | 2000    | CLIP                 | Selected based on MLST |                                                                     | 1       | IVb           | CC1            | 256 | E137G      | 0024       | Asc19Apa18   |
| SLCC1849   | SLCC1849                        | Animal      | Switzerland     | 1964    | SLCC                 | Selected based on MLST |                                                                     | 1       | IVb           | CC1            | 258 | I107M      | 0024       | Asc19Apa18   |
| LM84441    | 84441                           | Environment | France          | 2000    | CLIP                 | Selected based on MLST |                                                                     | 1       | IVb           | CC1            | 385 |            | 0025       | Asc20Apa27   |
| LM11-00084 | 2011/00084                      | Animal      | Switzerland     |         | CLIP                 | Selected based on MLST |                                                                     | 1       | IVb           | CC1            | 413 |            | 0024       | Asc25Apa26   |
| LM11-00105 | 2011/00105                      | Animal      | Switzerland     |         | CLIP                 | Selected based on MLST |                                                                     | 1       | IVb           | CC1            | 414 |            | 0024       | Asc20Apa27   |
| J0161      | J0161                           | Human       | USA             | 2000    | GenBank              | Outbreak set           | Sliced turkey deli meat multistate outbreak, USA, 2000              | 2       | IIa           | CC11           | 11  |            | 0013       | n.d.         |
| LM10-01447 | TS4/F.6854, FSL N3-031          | Food        | USA             | 1989    | ILSI                 | Outbreak set           | Sporadic, Turkey Franks, Oklahoma, USA, 1989                        | 2       | IIa           | CC11           | 11  |            | 0013       | Asc15Apa50   |
| LM10-01459 | J2818, FSL F6-154               | Food        | USA             | 2000    | ILSI                 | Outbreak set           | Sliced turkey deli meat multistate outbreak, USA, 2000              | 2       | IIa           | CC11           | 11  |            | 0013       | Asc15Apa50   |
| LM10-01429 | FSL M1-004                      | Human       |                 | 1997    | ILSI                 | Diversity Set          |                                                                     | 2       | IIa           | CC155          | 155 |            | 0007       | Asc33Apa48   |
| LM10-01432 | FSL J2-063                      | Animal      |                 | 1993    | ILSI                 | Diversity Set          |                                                                     | 2       | IIa           | CC16           | 16  |            | 0003       | Asc34Apa39   |
| Aureli1997 | Aureli1997                      |             | Italy           | 1997    | Reference strain     | Outbreak set           | Febrile gastroenteritis outbreak, Italy, 1997                       | 1       | IVb           | CC2            | 2   |            | 0030       | n.d.         |
| LM06-01589 | 2006/01589                      | Food        | Colombia        | unknown | CLIP                 | Selected based on MLST |                                                                     | 1       | IVb           | CC2            | 2   |            | 0027       | Asc11Apa7    |
| LM07-00231 | 2007/00231                      | Food        | Morocco         | unknown | CLIP                 | Selected based on MLST |                                                                     | 1       | IVb           | CC2            | 2   |            | 0027       | Asc9Apa5     |
| LM09-00290 | 2009/00290                      | Human       | Tunisia         | 2005    | CLIP                 | Selected based on MLST |                                                                     | 1       | IVb           | CC2            | 2   |            | 0027       | Asc9Apa5     |
| LM10-01417 | Scott A, FSL J1-225             | Human       | USA             | 1983    | ILSI                 | Outbreak set           | Pasteurized milk, Massachusetts, USA, 1983                          | 1       | IVb           | CC2            | 2   |            | 0028       | Asc8Apa5     |
| LM10-01443 | TS45/L.3350, FSL N3-013         | Food        | United Kingdom  | 1988    | ILSI                 | Outbreak set           | Pâté outbreak, UK and Ireland, 1987-89                              | 1       | IVb           | CC2            | 2   |            | 0027       | Asc8Apa5     |
| LM10-01444 | TS38/L.3306, FSL J1-116         | Human       | United Kingdom  | 1988    | ILSI                 | Outbreak set           | Pâté outbreak, UK and Ireland, 1987-89                              | 1       | IVb           | CC2            | 2   |            | 0027       | Asc8Apa5     |
| LM10976    | 10976                           | Animal      | Algeria         | 1988    | CLIP                 | Selected based on MLST |                                                                     | 1       | IVb           | CC2            | 2   |            | 0027       | Asc14Apa13   |
| LM13007    | 13007                           | Unknown     | Australia       | < 1989  | CLIP                 | Selected based on MLST |                                                                     | 1       | IVb           | CC2            | 2   |            | 0027       | Asc11Apa9    |
| LM21436    | 21436                           | Food        | China           | unknown | CLIP                 | Selected based on MLST |                                                                     | 1       | IVb           | CC2            | 2   |            | 0027       | Asc12Apa11   |
| LM58204    | 58204                           | Human       | Tunisia         | 1994    | CLIP                 | Selected based on MLST |                                                                     | 1       | IVb           | CC2            | 2   |            | 0027       | Asc9Apa8     |
| LM59597    | 59597                           | Human       | Spain           | 1991    | CLIP                 | Selected based on MLST |                                                                     | 1       | IVb           | CC2            | 2   |            | 0027       | Asc9Apa5     |
| LM69877    | 69877                           | Human       | Argentina       | unknown | CLIP                 | Selected based on MLST |                                                                     | 1       | IVb           | CC2            | 2   |            | 0029       | Asc11Apa15   |
| LM70320    | 70320                           | Human       | New Zealand     | 1995    | CLIP                 | Selected based on MLST |                                                                     | 1       | IVb           | CC2            | 2   |            | 0027       | Asc11Apa9    |
| LM70940    | 70940                           | Animal      | Greece          | < 1996  | CLIP                 | Selected based on MLST |                                                                     | 1       | IVb           | CC2            | 2   |            | 0027       | Asc9Apa8     |
| LM76305    | 76305                           | Human       | Algeria         | 1998    | CLIP                 | Selected based on MLST |                                                                     | 1       | IVb           | CC2            | 2   |            | 0027       | Asc9Apa6     |
| LM76641    | 76641                           | Food        | Portugal        | 1998    | CLIP                 | Selected based on MLST |                                                                     | 1       | IVb           | CC2            | 2   |            | 0027       | Asc9Apa8     |
| LM80415    | 80415                           | Food        | Qatar           | unknown | CLIP                 | Selected based on MLST |                                                                     | 1       | IVb           | CC2            | 2   |            | 0027       | Asc9Apa12    |
| LM85058    | 85058                           | Food        | Colombia        | 2000    | CLIP                 | Selected based on MLST |                                                                     | 1       | IVb           | CC2            | 2   |            | 0027       | Asc12Apa10   |
| LM88513    | 88513                           | Environment | Mexico          | 1999    | CLIP                 | Selected based on MLST |                                                                     | 1       | IVb           | CC2            | 2   |            | 0027       | Asc11Apa9    |
| SLCC1531   | SLCC1531                        | Human       | Denmark         | 1962    | SLCC                 | Selected based on MLST |                                                                     | 1       | IVb           | CC2            | 2   |            | 0027       | Asc10Apa9    |
| SLCC2524   | SLCC2524                        | Human       | United Kingdom  | 1966    | SLCC                 | Selected based on MLST |                                                                     | 1       | IVb           | CC2            | 2   |            | 0027       | Asc11Apa8    |
| SLCC299    | SLCC299                         | Human       | USA             | 1955    | SLCC                 | Selected based on MLST |                                                                     | 1       | IVb           | CC2            | 2   |            | 0027       | Asc14Apa14   |
| LM15843    | LM15843                         | Human       | France          | 1990    | CLIP                 | Selected based on MLST |                                                                     | 1       | IVb           | CC2            | 50  |            | 0027       | Asc13Apa4    |
| LM84220    | LM84220                         | Human       | France          | 2000    | CLIP                 | Selected based on MLST |                                                                     | 1       | IVb           | CC2            | 51  |            | 0027       | Asc12Apa8    |
| LM75327    | 75327                           | Human       | Morocco         | unknown | CLIP                 | Selected based on MLST |                                                                     | 1       | IVb           | CC2            | 277 |            | 0027       | Asc8Apa17    |
| LM10-01423 | FSL J1-177                      | Human       |                 | 1997    | ILSI                 | Diversity Set          |                                                                     | 1       | IIb           | CC288          | 288 |            | 0033       | Asc5Apa34    |
| FSLN1-017  | FSLN1-017                       | Food        | USA             |         | GenBank              | Reference strain       |                                                                     | 1       | IIb           | CC3            | 3   |            | 0035       | n.d.         |
| LM10-01426 | FSL J1-049                      | Human       |                 | 2010    | ILSI                 | Diversity Set          |                                                                     | 1       | IIb           | CC3            | 3   |            | 0035       | Asc3Apa30    |
| LM10-01453 | G6003, FSL R2-502               | Food        | USA             | 1994    | ILSI                 | Outbreak set           | Pasteurized chocolate milk, Illinois, USA, 1994                     | 1       | IIb           | CC3            | 3   |            | 0035       | Asc3Apa29    |
| LM10-01454 | G6054, FSL R2-503               | Human       | USA             | 1994    | ILSI                 | Outbreak set           | Pasteurized chocolate milk, Illinois, USA, 1994                     | 1       | IIb           | CC3            | 3   |            | 0035       | Asc3Apa29    |
| LM10-01430 | FSL J2-031                      | Animal      |                 | 1996    | ILSI                 | Diversity Set          |                                                                     | 2       | IIa           | CC394          | 394 |            | 0004       | Asc30Apa37   |
| LM80459    | CLIP 80459                      | Human       | France          | 1999    | CLIP                 | Outbreak set           | Pork rillettes (Potted pork, pâté-like RTE meat), France, 1999-2000 | 1       | IVb           | CC4            | 4   |            | 0020       | n.d.         |
| FSLJ2-064  | FSLJ2-064                       | Human       | USA             |         | GenBank              | Reference strain       |                                                                     | 1       | IIb           | CC5            | 5   |            | 0036       | n.d.         |
| LM10-01422 | FSL J2-064                      | Animal      |                 | 1989    | ILSI                 | Diversity Set          |                                                                     | 1       | IIb           | CC5            | 5   |            | 0036       | Asc4Apa1     |
| LM10-01425 | FSL J1-169                      | Human       |                 | 1996    | ILSI                 | Diversity Set          |                                                                     | 1       | IIb           | CC5            | 5   |            | 0036       | Asc2Apa2     |
| LM10-01424 | CU-BR9/93, FSL J2-035           | Animal      |                 | 1993    | ILSI                 | Diversity Set          |                                                                     | 1       | IIb           | CC59           | 59  |            | 0034       | Asc1Apa3     |
| LM07-01127 | 2007/01127                      | Food        | Netherlands     | < 2007  | CLIP                 | Selected based on MLST |                                                                     | 1       | IVb           | CC6            | 6   |            | 0021       | Asc6Apa35    |
| LM10-01418 | H7550, FSL N1-225               | Human       | USA             | 1998    | ILSI                 | Outbreak set           | Hot dogs / meat frankfurters, Multiple states, USA, 1998-99         | 1       | IVb           | CC6            | 6   |            | 0021       | Asc6Apa36    |
| LM10-01450 | H7738, FSL N1-227               | Food        | USA             | 1998    | ILSI                 | Outbreak set           | Hot dogs / meat frankfurters, Multiple states, USA, 1998-99         | 1       | IVb           | CC6            | 6   |            | 0022       | Asc6Apa35    |
| LM10-01455 | J1735, FSL R2-763               | Human       | USA             | 2002    | ILSI                 | Outbreak set           | Delicatessen turkey ready-to-eat meats, Multiple states, USA, 2002  | 1       | IVb           | CC6            | 6   |            | 0021       | Asc7Apa35    |
| LM10-01456 | J1925, FSL R2-764               | Food        | USA             | 2002    | ILSI                 | Outbreak set           | Delicatessen turkey ready-to-eat meats, Multiple states, USA, 2002  | 1       | IVb           | CC6            | 6   |            | 0021       | Asc7Apa35    |

|            |                       |             |                |         |                  |                        |                                                                                |   |     |                 |     |       |            |            |
|------------|-----------------------|-------------|----------------|---------|------------------|------------------------|--------------------------------------------------------------------------------|---|-----|-----------------|-----|-------|------------|------------|
| LM10-01457 | J1815, FSL R2-765     | Environment | USA            | 2002    | ILSI             | Outbreak set           | Delicatessen turkey ready-to-eat meats, Multiple states, USA, 2002             | 1 | IVb | CC6             | 6   | 0021  | Asc7Apa35  |            |
| LM67774    | 67774                 | Environment | Greece         | < 1995  | CLIP             | Selected based on MLST |                                                                                | 1 | IVb | CC6             | 6   | 0021  | Asc6Apa35  |            |
| LM67783    | 67783                 | Food        | Greece         | < 1995  | CLIP             | Selected based on MLST |                                                                                | 1 | IVb | CC6             | 6   | 0021  | Asc6Apa35  |            |
| LM77002    | LM77002               | Human       | France         | 1998    | CLIP             | Selected based on MLST |                                                                                | 1 | IVb | CC6             | 6   | 0021  | Asc6Apa31  |            |
| LM77092    | LM77092               | Human       | France         | 1998    | CLIP             | Selected based on MLST |                                                                                | 1 | IVb | CC6             | 6   | 0023  | Asc6Apa31  |            |
| LM81146    | LM81146               | Human       | France         | 2000    | CLIP             | Selected based on MLST |                                                                                | 1 | IVb | CC6             | 6   | 0021  | Asc6Apa33  |            |
| LM81438    | LM81438               | Human       | France         | 2000    | CLIP             | Selected based on MLST |                                                                                | 1 | IVb | CC6             | 6   | 0021  | Asc6Apa33  |            |
| LM84344    | LM84344               | Human       | France         | 2000    | CLIP             | Selected based on MLST |                                                                                | 1 | IVb | CC6             | 6   | 0021  | Asc6Apa31  |            |
| LM88501    | 88501                 | Environment | Mexico         | 1999    | CLIP             | Selected based on MLST |                                                                                | 1 | IVb | CC6             | 6   | 0021  | Asc6Apa32  |            |
| LM95986    | LM95986               | Human       | France         | 2004    | CLIP             | Selected based on MLST |                                                                                | 1 | IVb | CC6             | 6   | 0021  | Asc6Apa31  |            |
| LM10-01427 | FSL C1-056            | Human       |                | 1998    | ILSI             | Diversity Set          |                                                                                | 2 | IIa | CC7             | 7   | 0008  | Asc26Apa53 |            |
| LM24902    | 24902                 | Food        | United Kingdom | 1992    | CLIP             | Selected based on MLST |                                                                                | 2 | IIa | CC7             | 7   | 0008  | Asc29Apa51 |            |
| LM56346    | 56346                 | Animal      | Israel         | 1993    | CLIP             | Selected based on MLST |                                                                                | 2 | IIa | CC7             | 7   | 0008  | Asc26Apa51 |            |
| LM8077     | 8077                  | Food        | Finland        | 1987    | CLIP             | Selected based on MLST |                                                                                | 2 | IIa | CC7             | 7   | 0008  | Asc28Apa52 |            |
| SLCC2864   | SLCC2864              | Food        | Germany        | 1968    | SLCC             | Selected based on MLST |                                                                                | 2 | IIa | CC7             | 7   | 0010  | Asc27Apa46 |            |
| EGD        | EGD                   |             |                |         | Reference strain | Reference strain       |                                                                                | 2 | IIa | CC7             | 12  |       | n.d.       |            |
| 10403S     | 10403S                | Human       | USA            | 1968    | GenBank          | Reference strain       |                                                                                | 2 | IIa | CC7             | 85  | S120R | n.d.       |            |
| LM68625    | 68625                 | Human       | Algeria        | 1992    | CLIP             | Selected based on MLST |                                                                                | 2 | IIa | CC8             | 8   |       | Asc34Apa39 |            |
| 08-5923    | 08-5923               | Human       | Canada         | 2008    | GenBank          | Outbreak set           | ready-to-eat meat products outbreak, Canada, 2008                              | 2 | IIa | CC8             | 120 |       | n.d.       |            |
| LM68619    | 68619                 | Human       | Italy          | 1995    | CLIP             | Selected based on MLST |                                                                                | 2 | IIa | CC8             | 120 |       | Asc35Apa40 |            |
| LM62719    | 62719                 | Human       | New Zealand    | 1994    | CLIP             | Selected based on MLST |                                                                                | 2 | IIa | CC8             | 232 | H121R | Asc35Apa39 |            |
| LM90291    | 90291                 | Food        | Chile          | unknown | CLIP             | Selected based on MLST |                                                                                | 2 | IIa | CC8             | 289 | Y95C  | Asc39Apa39 |            |
| 08-5578    | 08-5578               | Human       | Canada         | 2008    | GenBank          | Outbreak set           | ready-to-eat meat products outbreak, Canada, 2008                              | 2 | IIa | CC8             | 292 |       | n.d.       |            |
| LM05-01099 | 2005/01099            | Human       | Portugal       | < 2005  | CLIP             | Selected based on MLST |                                                                                | 2 | IIc | CC9             | 9   |       | Asc36Apa43 |            |
| LM06-00139 | 2006/00139            | Environment | France         | 2006    | CLIP             | Selected based on MLST |                                                                                | 2 | IIc | CC9             | 9   |       | Asc36Apa43 |            |
| LM06-00810 | 2006/00810            | Environment | Italy          | 2005    | CLIP             | Selected based on MLST |                                                                                | 2 | IIc | CC9             | 9   |       | Asc38Apa43 |            |
| LM07-01172 | 2007/01172            | Animal      | Italy          | 2003    | CLIP             | Selected based on MLST |                                                                                | 2 | IIc | CC9             | 9   |       | Asc37Apa45 |            |
| LM10-01433 | TS02/L896, FSL J1-094 | Human       |                | 2010    | ILSI             | Diversity Set          |                                                                                | 2 | IIc | CC9             | 9   |       | Asc36Apa43 |            |
| LM11308    | 11308                 | Human       | New Zealand    | 1988    | CLIP             | Selected based on MLST |                                                                                | 2 | IIc | CC9             | 9   |       | Asc36Apa43 |            |
| LM12485    | 12485                 | Food        | France         | 1988    | CLIP             | Selected based on MLST |                                                                                | 2 | IIc | CC9             | 9   |       | Asc36Apa43 |            |
| LM14228    | 14228                 | Food        | Denmark        | 1989    | CLIP             | Selected based on MLST |                                                                                | 2 | IIa | CC9             | 9   |       | Asc38Apa43 |            |
| LM15183    | 15183                 | Human       | Finland        | 1989    | CLIP             | Selected based on MLST |                                                                                | 2 | IIc | CC9             | 9   |       | Asc37Apa43 |            |
| LM70956    | 70956                 | Animal      | Greece         | < 1996  | CLIP             | Selected based on MLST |                                                                                | 2 | IIc | CC9             | 9   |       | Asc36Apa43 |            |
| LM71634    | 71634                 | Food        | Portugal       | < 1996  | CLIP             | Selected based on MLST |                                                                                | 2 | IIc | CC9             | 9   |       | Asc37Apa44 |            |
| LM78008    | 78008                 | Unknown     | Germany        | < 1999  | CLIP             | Selected based on MLST |                                                                                | 2 | IIc | CC9             | 9   |       | Asc38Apa43 |            |
| LM8742     | 8742                  | Food        | Austria        | 1986    | CLIP             | Selected based on MLST |                                                                                | 2 | IIc | CC9             | 9   |       | Asc42Apa43 |            |
| LM8796     | 8796                  | Food        | Austria        | 1988    | CLIP             | Selected based on MLST |                                                                                | 2 | IIc | CC9             | 9   |       | Asc36Apa43 |            |
| LM9134     | 9134                  | Food        | Spain          | 1988    | CLIP             | Selected based on MLST |                                                                                | 2 | IIc | CC9             | 9   |       | Asc36Apa43 |            |
| EGDe-CNR   | EGDe-CNR              |             | Europe         |         | Reference strain | Reference strain       |                                                                                | 2 | IIa | CC9             | 35  |       | Asc39Apa47 |            |
| LM67781    | 67781                 | Food        | Greece         | < 1995  | CLIP             | Selected based on MLST |                                                                                | 2 | IIc | CC9             | 115 | E115G | Asc37Apa43 |            |
| SLCC21     | SLCC21                | Human       | United Kingdom | 1935    | SLCC             | Selected based on MLST |                                                                                | 2 | IIc | CC9             | 122 | F145L | Asc36Apa43 |            |
| LO28       | LO28                  |             |                |         | Reference strain | Reference strain       |                                                                                | 2 | IIc | CC9             | 210 | M146K | 0014       | n.d.       |
| LM07-01124 | 2007/01124            | Human       | Netherlands    | < 2007  | CLIP             | Selected based on MLST |                                                                                | 2 | IIc | CC9             | 223 |       | 0014       | Asc36Apa43 |
| FSLN3-165  | FSLN3-165             | Animal      | USA            |         | GenBank          | Reference strain       |                                                                                | 2 | IIa | CC90            | 90  |       | 0006       | n.d.       |
| LM10-01434 | FSL C1-115            | Human       |                | 1998    | ILSI             | Diversity Set          |                                                                                | 2 | IIa | singleton ST370 | 370 |       | 0017       | Asc41Apa49 |
| LM10-01431 | FSL J2-066            | Animal      |                | 1994    | ILSI             | Diversity Set          |                                                                                | 2 | IIa | singleton ST376 | 376 |       | 0005       | Asc31Apa38 |
| LM10-01428 | CU-BR1/93, FSL J2-054 | Animal      |                | 1993    | ILSI             | Diversity Set          |                                                                                | 2 | IIa | singleton ST412 | 412 |       | 0018       | Asc40Apa42 |
| LM10-01419 | FSL J2-020            | Animal      |                | 1986    | ILSI             | Diversity Set          |                                                                                | 2 | IIa | singleton ST556 | 556 |       | 0012       | Asc32Apa41 |
| LM10-01451 | J0144, FSL R2-500     | Food        | USA            | 2000    | ILSI             | Outbreak set           | Home-made Mexican-style fresh Cheese Queso fresco, N. Carolina, USA, 2000-2001 | 1 | IVb | singleton ST558 | 558 |       | 0019       | Asc21Apa27 |
| LM10-01452 | J0211, FSL R2-501     | Human       | USA            | 2000    | ILSI             | Outbreak set           | Home-made Mexican-style fresh Cheese Queso fresco, N. Carolina, USA, 2000-2001 | 1 | IVb | singleton ST558 | 558 |       | 0019       | Asc21Apa27 |
| FSLJ1-175  | FSLJ1-175             | Environment | USA            |         | GenBank          | Reference strain       |                                                                                | 1 | IIb | singleton ST87  | 87  |       | 0031       | n.d.       |
| FSLJ1-194  | FSLJ1-194             | Human       | USA            |         | GenBank          | Reference strain       | sporadic listeriosis case                                                      | 1 | IIb | singleton ST88  | 88  |       | 0032       | n.d.       |

The table is sorted by the clonal complex column information, then by ST, then by key

CLIP: Collection of Listeria of Institut Pasteur; ILSI: International Life Sciences Institute North America Listeria monocytogenes strain collection

SLCC: Seeliger Listeria culture collection
