# Supplementary material
Source: PubMed Central journal article supplement (PMC3889766)
Supplement: JCM.01874-13_zjm999092927so4.pdf [file JCM.01874-13_zjm999092927so4.pdf]

Table S2. Detection of recombination within lineages I and II at MvLST and MLST genes

|                     | locus               | $\theta$    |            | $\rho$    |            | $r/\mu$   |            |
|---------------------|---------------------|-------------|------------|-----------|------------|-----------|------------|
|                     |                     | lineage I   | lineage II | lineage I | lineage II | lineage I | lineage II |
| MvLST               | <i>actA</i>         | 0.016       | 0.016      | 0.05      | 4.925 *    | 0.007     | 0.681      |
|                     | <i>clpP</i>         | 0.006       | 0.001      | 0.151     | 2.044      | 0.057     | 4.517      |
|                     | <i>dal</i>          | 0.020       | 0.025      | 0         | 2.613 *    | 0         | 0.244      |
|                     | <i>inlA</i>         | 0.009       | 0.010      | 0.276     | 18.791 *   | 0.013     | 0.758      |
|                     | <i>inlB</i>         | 0.016       | 0.006      | 0.729     | 0          | 0.106     | 0          |
|                     | <i>inlC</i>         | 0.005       | 0.002      | 0         | 9.146      | 0         | 10.108     |
|                     | <i>lisR</i>         | 0.002       | 0.018      | 0.427     | 0.603      | 0.425     | 0.076      |
|                     | <i>prfA</i>         | 0.008       | 0.001      | 0         | 1.800      | 0         | 3.993      |
|                     | Concat <sup>b</sup> | 0.010       | 0.010      | 0         | 0.151 *    | 0         | 0.003      |
|                     | MLST                | <i>abcZ</i> | 0.008      | 0.010     | 0          | 1.131     | 0          |
| <i>bglA</i>         |                     | 0.007       | 0.006      | 3.317     | 3.543      | 1.256     | 1.552      |
| <i>cat</i>          |                     | 0.002       | 0.005      | 16.759    | 6.181      | 16.659    | 2.718      |
| <i>dapE</i>         |                     | 0.003       | 0.005      | 3.411 *   | 9.121 *    | 2.421     | 3.739      |
| <i>dat</i>          |                     | 0.002       | 0.002      | 1.706     | 4.673      | 1.701     | 5.167      |
| <i>ldh</i>          |                     | 0.005       | 0.012      | 0         | 0.377      | 0         | 0.071      |
| <i>lhkA</i>         |                     | 0.002       | 0.002      | 74.916    | 2.714      | 93.458    | 2.396      |
| Concat <sup>b</sup> |                     | 0.004       | 0.006      | 22.626 *  | 6.814 *    | 1.699     | 0.343      |

Values for rho were obtained by dividing the per-locus recombination rate estimate from LDhat by the sequence length.

a, Significant estimates (at the 5% level).

b, Concat., concatenated data set with no indels.
